# Supplementary material for: Regulation of Hypoxic–Adenosinergic Signaling by Estrogen: Implications for Microvascular Injury
Source: MDPI journal article supplement (doi:10.3390/ph16030422), 2023-03-10
Supplement: s1 [file s1]

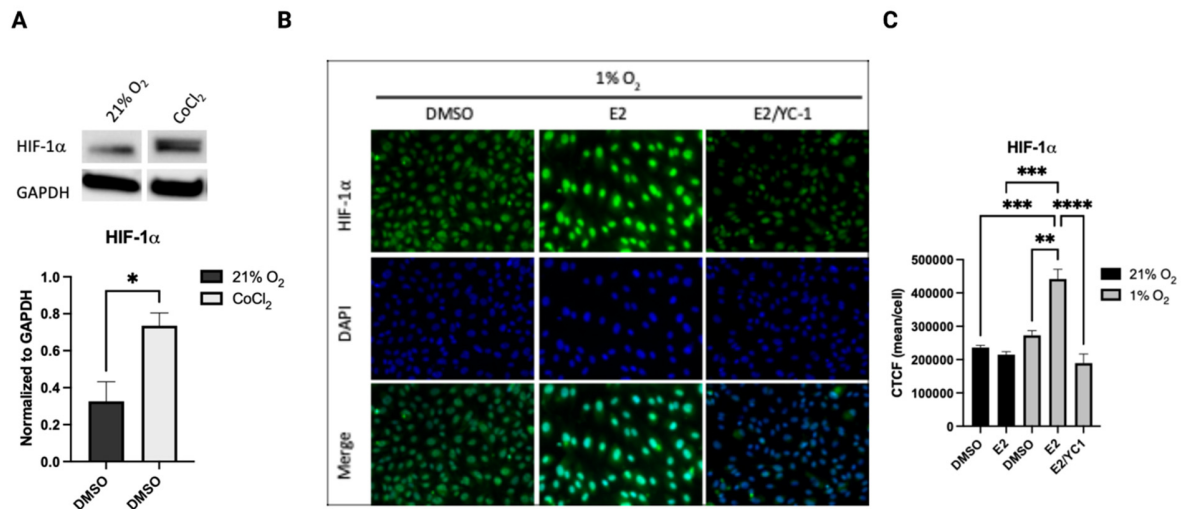

**Figure S1.** Estradiol positively regulates HIF-1α in hypoxia. (A) Representative western blot showing effect of vehicle (DMSO) on HIF-1α protein expression in HUVECs following normoxia (black) or cobalt chloride (gray) treatment. Protein expression quantified with densitometry; (B) Representative immunofluorescent images of HUVECs in presence of estradiol (E2, 1μM), YC-1 (10μM) or vehicle (DMSO) followed by 24-hour hypoxia exposure. HIF-1α green, Dapi blue. C. Quantification of HIF-1α immunofluorescence using corrected total cell fluorescence (CTCF) normalized to the number of cells. Data represent the mean ± SEM from three independent experiments. \**p* < 0.05; \*\**p* < 0.01; \*\*\**p* < 0.001 using one-way ANOVA with *post hoc* Tukey's test. For 1A: \**p* < 0.05 using unpaired t-test.

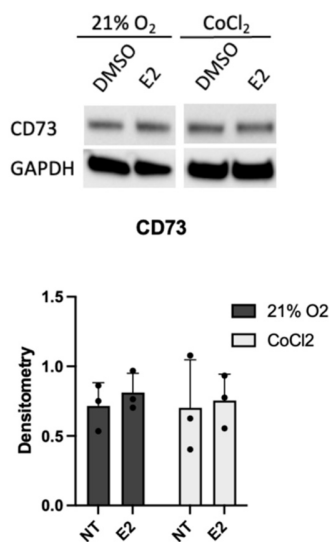

**Figure S2.** Estradiol does not change CD73 expression. Representative western blot showing effect of vehicle (DMSO) on CD73 protein expression in HUVECs following normoxia (black) or cobalt chloride (gray) treatment. Protein expression quantified with densitometry.

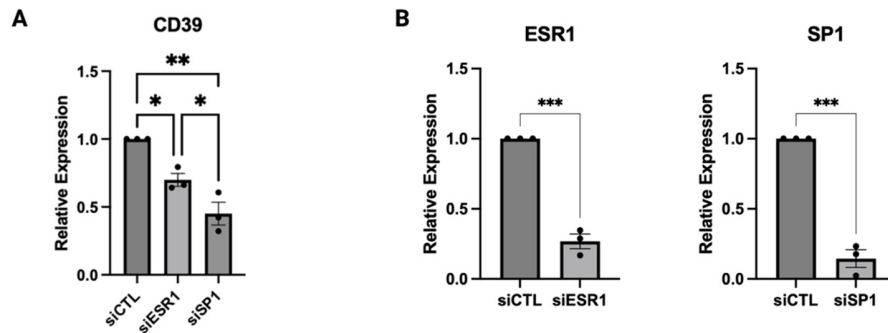

**Figure S3.** siRNA mediated reduction of target genes. **(A)** Relative gene expression of CD39 detected in HUVECs by q-RT-PCR 48 hours post transfection with siESR1, siSP1, or scramble control, siCTL. HUVECs exposed to CoCl<sub>2</sub> for 24 hours; **(B)** Relative gene expression detected by q-RT-PCR 48 hours post transfection with siESR1 (right) or siSP1 (left). Relative expression of targets was calculated by normalizing to expression levels in cells treated with scrambled negative control siRNA (siCTL). Gene expression was determined after normalization to human GAPDH. Data represent the mean  $\pm$  SEM from three independent experiments. For SF2A: \*\* $p$  < 0.01; \*\* $p$  < 0.01 using one-way ANOVA with *post hoc* Tukey's test. For SF2B: \*\*\* $p$  < 0.001 using unpaired t-test.

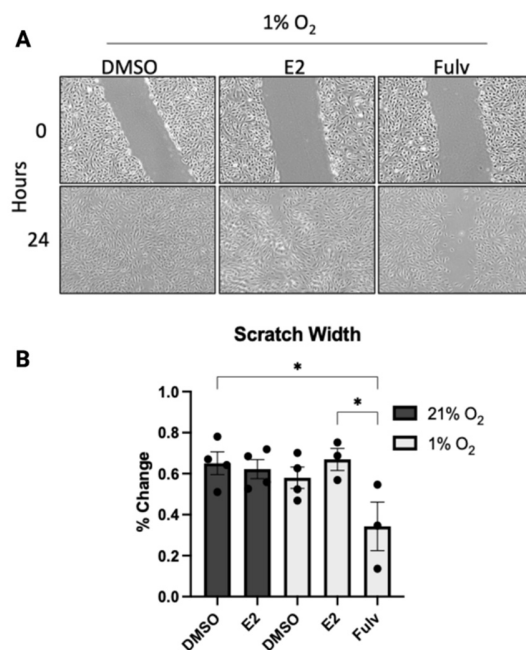

**Figure S4.** Endothelial cell migration halted with inhibition of estrogen activity. **(A)** Representative images of "wound" at 0 and 24 hours in 1% oxygen; **(B)** Quantification expressed as the percentage change in scratch width over 24 hours. Cells treated with estradiol (E2, 1 $\mu$ M), fulvestrant (Fulv, 1 $\mu$ M), or vehicle (DMSO) and exposed to hypoxia (1% O<sub>2</sub>) for 24 hours. Data represent the mean  $\pm$  SEM from three independent experiments. \* $P$  < 0.05 using one-way ANOVA with *post hoc* Tukey's test.

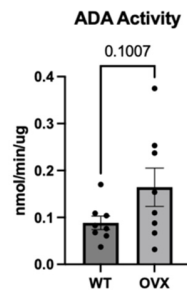

**Figure S5.** Serum Adenosine deaminase (ADA) measurement quantified from serum of WT v oophorectomized mice. Data represent the mean  $\pm$  SEM from each group.  $N=10/\text{group}$ .  $P=0.1007$  using unpaired t-test.

## Major Resources Table

**Table S1: Animals (in vivo studies)**

| Species | Vendor or Source   | Background Strain | Sex | Persistent ID / URL                                                                                                                                                                                     |
|---------|--------------------|-------------------|-----|---------------------------------------------------------------------------------------------------------------------------------------------------------------------------------------------------------|
| C57BL/6 | Charles River Labs | C57BL/6           | F   | <a href="https://www.criver.com/products-services/find-model/c57bl6-mouse?region=3611#">https://www.criver.com/products-services/find-model/c57bl6-mouse?region=3611#</a> , accessed on 13 January 2022 |

**Table S2: siRNA**

| Target                       | siRNA ID | Product Number | Source            |
|------------------------------|----------|----------------|-------------------|
| SP1                          | s13319   | 4392420        | Life Technologies |
| ESR1                         | s4823    | 4392420        | Life Technologies |
| Negative Control No. 1 siRNA | AM4611   | 4392420        | Life Technologies |

**Table S3: Antibodies**

| Target antigen                                                                               | Vendor or Source | Catalog #  | Working concentration | Lot # (preferred but not required) | Persistent ID / URL |
|----------------------------------------------------------------------------------------------|------------------|------------|-----------------------|------------------------------------|---------------------|
| Anti-mouse IgG, HRP-linked                                                                   | Cell Signaling   | 7076       | 1:10,000              |                                    | RRID:AB_330924      |
| Anti-rabbit IgG, HRP-linked                                                                  | Cell Signaling   | 7074       | 1:20,000              |                                    | RRID:AB_2099233     |
| CD39                                                                                         | ThermoFisher     | MA5-32707  | 1:1000 (1:100 IF)     |                                    | RRID:AB_2809984     |
| Donkey anti-Rabbit IgG (H+L) Highly Cross-Adsorbed Secondary Antibody, Alexa Fluor™ Plus 594 | Invitrogen       | A32754     | 1:600                 |                                    | RRID:AB_2762827     |
| ENT-1                                                                                        | Proteintech      | 11337-1-AP | 1:1000                |                                    | RRID:AB_2190784     |
| ERa                                                                                          | Abcam            | ab108398   | 1:1000                |                                    | RRID:AB_10863604    |
| ERb                                                                                          | Abcam            | ab3576     | 1:1000                |                                    | RRID:AB_303922      |
| Erk1/2                                                                                       | Cell Signaling   | 4695       | 1:1000                |                                    | RRID:AB_390779      |
| GAPDH                                                                                        | Cell Signaling   | 2118       | 1:1000                |                                    | RRID:AB_561053      |
| Goat anti-Mouse IgG (H+L) Highly Cross-Adsorbed Secondary                                    | Invitrogen       | a32723     | 1:600                 |                                    | RRID:AB_2633275     |

|                                 |                |        |                   |  |                 |
|---------------------------------|----------------|--------|-------------------|--|-----------------|
| Antibody, Alexa Fluor™ Plus 488 |                |        |                   |  |                 |
| HIF-1a                          | BD Biosciences | 610959 | 1:1000 (1:100 IF) |  | RRID:AB_398272  |
| phospho-Erk1/2                  | Cell Signaling | 5726   | 1:1000            |  | RRID:AB_2797617 |

**Table S4: Cultured Cells**

| Name  | Vendor or Source | Sex (F, M, or unknown) | Persistent ID / URL                                                                                                              |
|-------|------------------|------------------------|----------------------------------------------------------------------------------------------------------------------------------|
| HUVEC | ATCC             | pooled                 | <a href="https://www.atcc.org/products/pcs-100-010">https://www.atcc.org/products/pcs-100-010</a> , accessed on 4 September 2021 |

**Table S5: Other Major Resources**

| Description                                                        | Source / Repository | Persistent ID / URL |
|--------------------------------------------------------------------|---------------------|---------------------|
| Adenosine Assay Kit (Fluorometric)                                 | Abcam               | ab211094            |
| Adenosine Deaminase Activity Assay Kit (Fluorometric)              | Sigma               | EPI020              |
| BCA Protein Assay                                                  | ThermoFisher        | 23227               |
| Caffeine                                                           | Sigma               | C0750               |
| CellTiter-Glo® 2.0                                                 | Promega             | G9242               |
| Charcol Stripped FBS                                               | ThermoFisher        | A3382101            |
| Cobalt Chloride                                                    | Sigma               | 15862-1ML-F         |
| cOmplete, Mini, EDTA-free Protease Inhibitor Cocktail              | Sigma               | 11836170001         |
| Cultrex Reduced Growth Factor Basement Membrane Extract, PathClear | R&D Systems         | 3433-010-01         |
| Dipyridamole                                                       | ThermoFisher        | J63329.14           |
| DMEM                                                               | ATCC                | 30-2002             |
| DMSO                                                               | ThermoFisher        | J66650.AE           |
| EGM-2 Endothelial Cell Growth Medium-2 BulletKit                   | Lonza               | CC-3162             |
| Estradiol                                                          | Sigma               | E2758               |
| Fulvestrant                                                        | Sigma               | I4409               |
| Hoechst 33258                                                      | Invitrogen          | H3569               |
| Lipofectamine RNAiMAX Transfection Reagent                         | ThermoFisher        | 13778030            |
| MultiScribe Reverse Transcriptase                                  | ThermoFisher        | 4311235             |
| Optimem                                                            | ThermoFisher        | 31985070            |
| Phosphatase Inhibitor Cocktail Set III                             | Sigma               | 524627              |
| RIPA Buffer                                                        | ThermoFisher        | 89901               |
| SsoAdvanced Universal SYBR Green Supermix                          | Bio-Rad             | 1725270             |
| SuperSignal West Pico PLUS Chemiluminescent Substrate              | ThermoFisher        | 34579               |

|      |                   |             |
|------|-------------------|-------------|
| YC-1 | Enzo Life Science | ALX-420-025 |
|------|-------------------|-------------|
